# Supplementary material for: A cold-water fish striving in a warming ocean: Insights from whole-genome sequencing of the Greenland halibut in the Northwest Atlantic
Source: Frontiers journal article supplement (doi:10.3389/fmars.2022.992504), 2022-09-02
Supplement: Table_3.xlsx [file Table_3.xlsx]

## Sheet: Sheet1
primers used for barcoding = from nextera XT set
N701:	5'	CAAGCAGAAGACGGCATACGAGAT	TCGCCTTA	GTCTCGTGGGCTCGG	3'
N702	5'	CAAGCAGAAGACGGCATACGAGAT	CTAGTACG	GTCTCGTGGGCTCGG	3'
N703	5'	CAAGCAGAAGACGGCATACGAGAT	TTCTGCCT	GTCTCGTGGGCTCGG	3'
N704	5'	CAAGCAGAAGACGGCATACGAGAT	GCTCAGGA	GTCTCGTGGGCTCGG	3'
N705	5'	CAAGCAGAAGACGGCATACGAGAT	AGGAGTCC	GTCTCGTGGGCTCGG	3'
N706	5'	CAAGCAGAAGACGGCATACGAGAT	CATGCCTA	GTCTCGTGGGCTCGG	3'
N707	5'	CAAGCAGAAGACGGCATACGAGAT	GTAGAGAG	GTCTCGTGGGCTCGG	3'
N710	5'	CAAGCAGAAGACGGCATACGAGAT	CAGCCTCG	GTCTCGTGGGCTCGG	3'
N711	5'	CAAGCAGAAGACGGCATACGAGAT	TGCCTCTT	GTCTCGTGGGCTCGG	3'
N712	5'	CAAGCAGAAGACGGCATACGAGAT	TCCTCTAC	GTCTCGTGGGCTCGG	3'
N714	5'	CAAGCAGAAGACGGCATACGAGAT	TCATGAGC	GTCTCGTGGGCTCGG	3'
N715	5'	CAAGCAGAAGACGGCATACGAGAT	CCTGAGAT	GTCTCGTGGGCTCGG	3'
N716	5'	CAAGCAGAAGACGGCATACGAGAT	TAGCGAGT	GTCTCGTGGGCTCGG	3'
N718	5'	CAAGCAGAAGACGGCATACGAGAT	GTAGCTCC	GTCTCGTGGGCTCGG	3'
N719	5'	CAAGCAGAAGACGGCATACGAGAT	TACTACGC	GTCTCGTGGGCTCGG	3'
N720	5'	CAAGCAGAAGACGGCATACGAGAT	AGGCTCCG	GTCTCGTGGGCTCGG	3'
N721	5'	CAAGCAGAAGACGGCATACGAGAT	GCAGCGTA	GTCTCGTGGGCTCGG	3'
N722	5'	CAAGCAGAAGACGGCATACGAGAT	ATGCGCAG	GTCTCGTGGGCTCGG	3'
N723	5'	CAAGCAGAAGACGGCATACGAGAT	GAGCGCTA	GTCTCGTGGGCTCGG	3'
N724	5'	CAAGCAGAAGACGGCATACGAGAT	CGCTCAGT	GTCTCGTGGGCTCGG	3'
N726	5'	CAAGCAGAAGACGGCATACGAGAT	CCTAAGAC	GTCTCGTGGGCTCGG	3'
N727	5'	CAAGCAGAAGACGGCATACGAGAT	CGATCAGT	GTCTCGTGGGCTCGG	3'
N728	5'	CAAGCAGAAGACGGCATACGAGAT	TGCAGCTA	GTCTCGTGGGCTCGG	3'
N729	5'	CAAGCAGAAGACGGCATACGAGAT	TCGACGTC	GTCTCGTGGGCTCGG	3'
S502:	5'	AATGATACGGCGACCACCGAGATCTACAC	CTCTCTAT	TCGTCGGCAGCGTC	3'
S503	5'	AATGATACGGCGACCACCGAGATCTACAC	TATCCTCT	TCGTCGGCAGCGTC	3'
S505	5'	AATGATACGGCGACCACCGAGATCTACAC	GTAAGGAG	TCGTCGGCAGCGTC	3'
S506	5'	AATGATACGGCGACCACCGAGATCTACAC	ACTGCATA	TCGTCGGCAGCGTC	3'
S507	5'	AATGATACGGCGACCACCGAGATCTACAC	AAGGAGTA	TCGTCGGCAGCGTC	3'
S508	5'	AATGATACGGCGACCACCGAGATCTACAC	CTAAGCCT	TCGTCGGCAGCGTC	3'
S510	5'	AATGATACGGCGACCACCGAGATCTACAC	CGTCTAAT	TCGTCGGCAGCGTC	3'
S511	5'	AATGATACGGCGACCACCGAGATCTACAC	TCTCTCCG	TCGTCGGCAGCGTC	3'
S513	5'	AATGATACGGCGACCACCGAGATCTACAC	TCGACTAG	TCGTCGGCAGCGTC	3'
S515	5'	AATGATACGGCGACCACCGAGATCTACAC	TTCTAGCT	TCGTCGGCAGCGTC	3'
S516	5'	AATGATACGGCGACCACCGAGATCTACAC	CCTAGAGT	TCGTCGGCAGCGTC	3'
S517	5'	AATGATACGGCGACCACCGAGATCTACAC	TCTTACGC	TCGTCGGCAGCGTC	3'
S518	5'	AATGATACGGCGACCACCGAGATCTACAC	CTATTAAG	TCGTCGGCAGCGTC	3'
S520	5'	AATGATACGGCGACCACCGAGATCTACAC	AAGGCTAT	TCGTCGGCAGCGTC	3'
S521	5'	AATGATACGGCGACCACCGAGATCTACAC	GAGCCTTA	TCGTCGGCAGCGTC	3'
S522	5'	AATGATACGGCGACCACCGAGATCTACAC	TTATGCGA	TCGTCGGCAGCGTC	3'
